# Supplementary material
Source: PubMed Central journal article supplement (PMC9215112)
Supplement: NIHMS1812862-supplement-Supplementary_Figure.pdf [file NIHMS1812862-supplement-Supplementary_Figure.pdf]

**Fig. S1**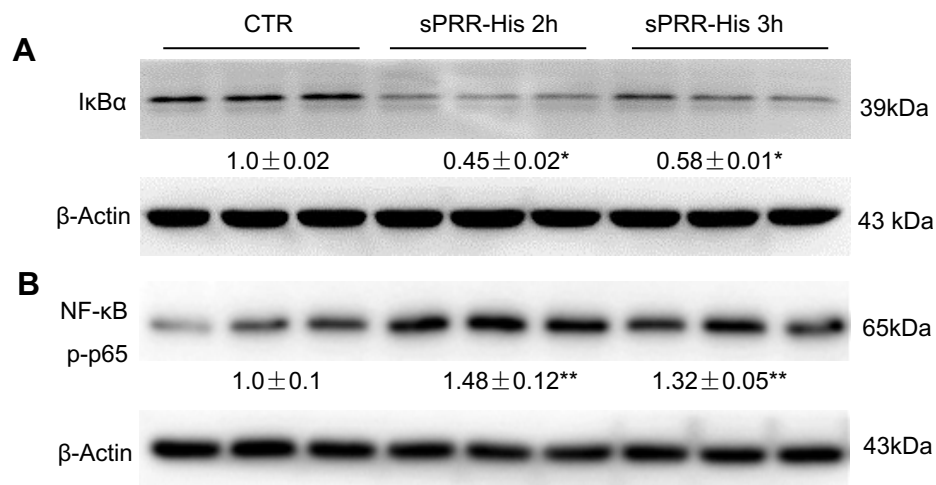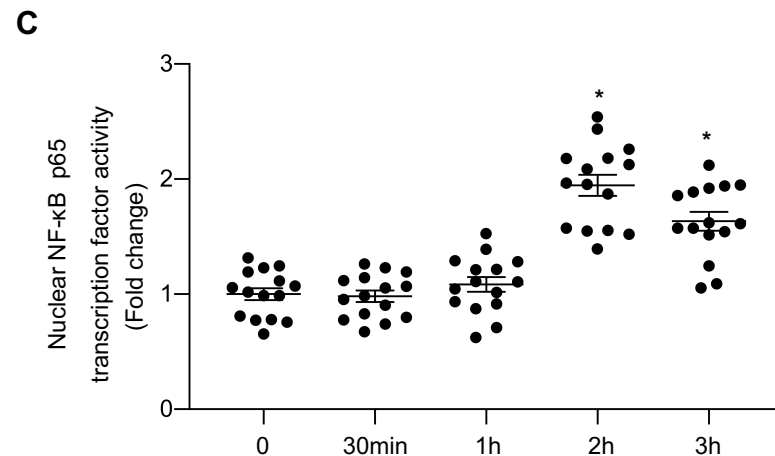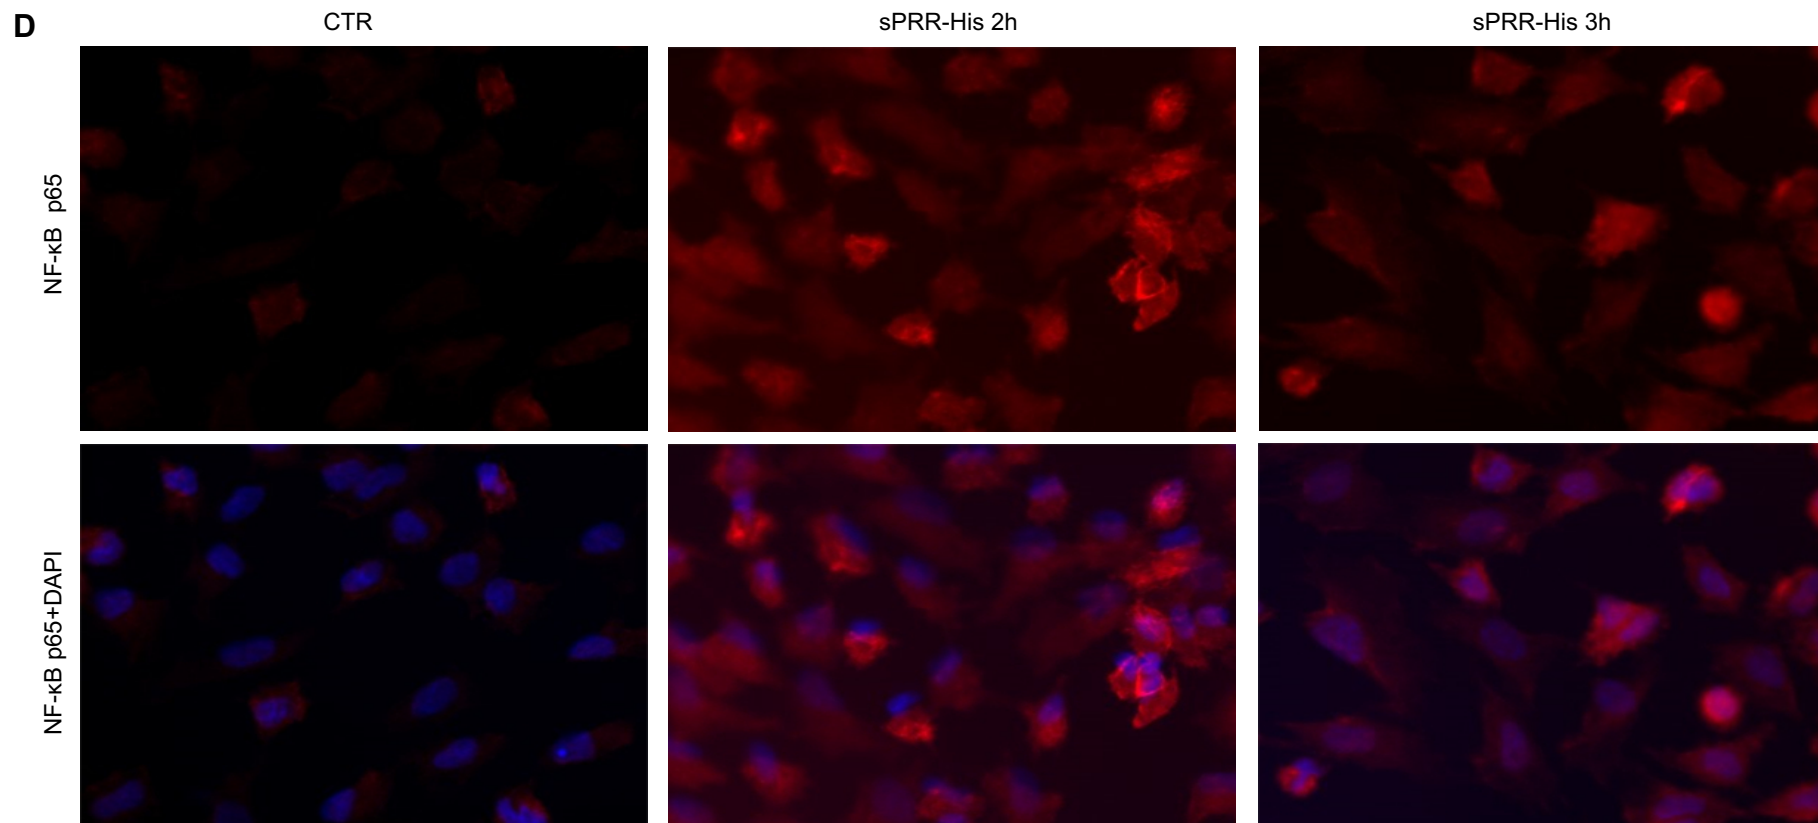

**Fig. S1. sPRR-His activates NF- $\kappa$ B in HUVECs.** HUVECs were treated with blank buffer or 50nM sPRR-His for the indicated durations. Relative protein expression levels of I $\kappa$ B $\alpha$  (**A**) and NF- $\kappa$ B p-p65 (**B**) were measured by Western blotting. The value beneath the image indicates the densitometry of the protein normalized to  $\beta$ -Actin for 3 separate experiments. (**C**) Nuclear proteins were extracted for a NF- $\kappa$ B p65 transcription factor activity assay. Statistical significance was determined by using unpaired Student's t test. \*P < 0.01, compared with the CTR; \*\*P < 0.05, compared with the CTR. (**D**) Cells were processed for immunofluorescence staining to assess the activation of NF- $\kappa$ B p65. N=9-15 (N represents the number of samples in each group, and the repetitions of separate experiments are 3-5). DAPI indicates 4',6-diamidino-2-phenylindole. Data are mean  $\pm$  SEM.

**Fig. S2**

**A**

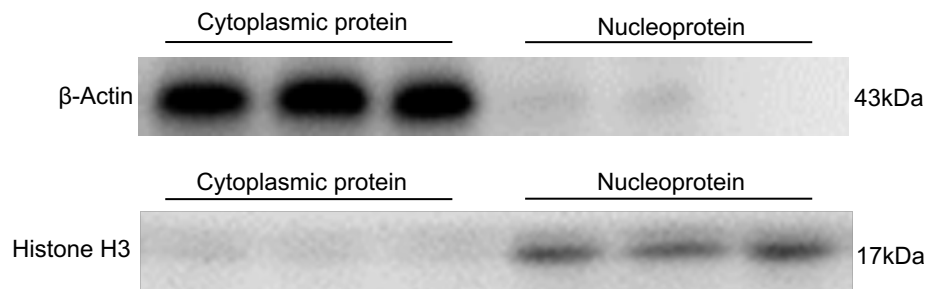

**B**

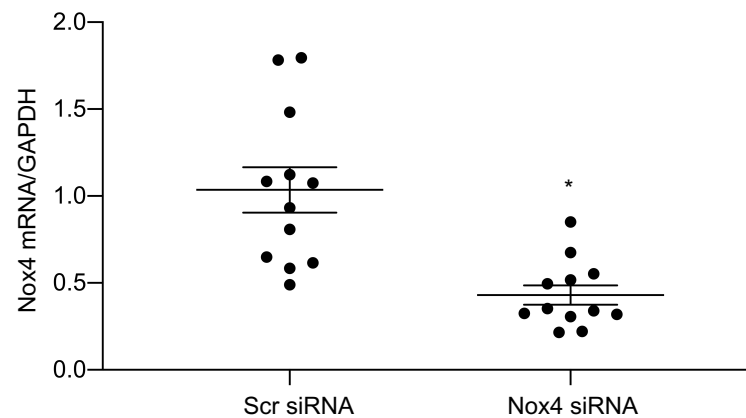

**C**

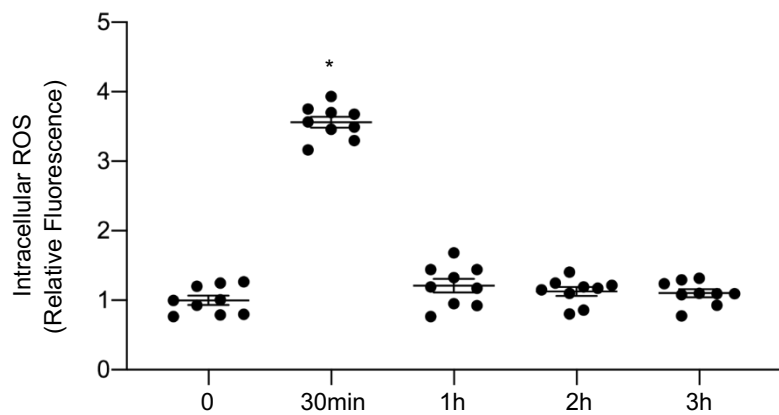

**D**

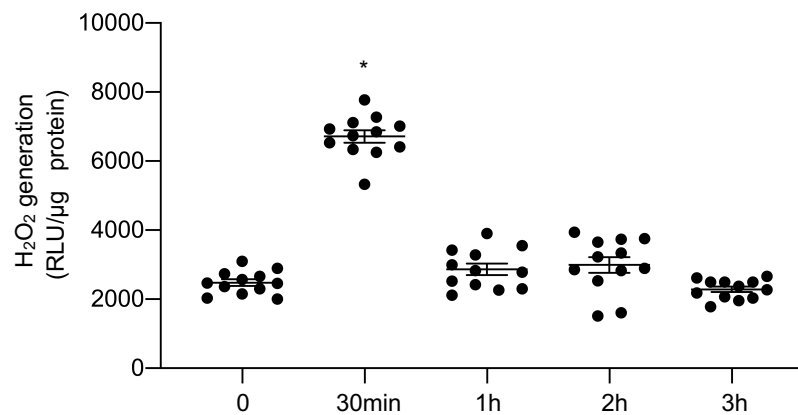

**Fig. S2. sPRR-His increases intracellular H<sub>2</sub>O<sub>2</sub>.** (A) Successful separation of cytoplasmic and nuclear fractions was verified using immunoblotting procedures. Relative protein expression levels of  $\beta$ -Actin in cytoplasmic protein and nucleoprotein were measured by Western blotting. Relative protein expression levels of Histone H3 in cytoplasmic protein and nucleoprotein were measured by Western blotting. (B) Validation of Nox4 knockdown by qRT-PCR. (C-D) HUVECs were treated with blank buffer or 50nM sPRR-His for 30min, 1h, 2h and 3h. (C) The formation of intracellular ROS was measured via monitoring the increasing fluorescence of 2'7'-dichlorofluorescein (DCF), and results are given as fold of changes over untreated controls. (D) Time course of H<sub>2</sub>O<sub>2</sub> generation after 50nM sPRR-His treatment. RLU, relative light units. N=9-12 (N represents the number of samples in each group, and the repetitions of separate experiments are 3-4). Statistical significance was determined by using unpaired Student's t test. \*P<0.01, compared with the CTR or Scr siRNA. Data are mean  $\pm$  SEM.

**Fig. S3**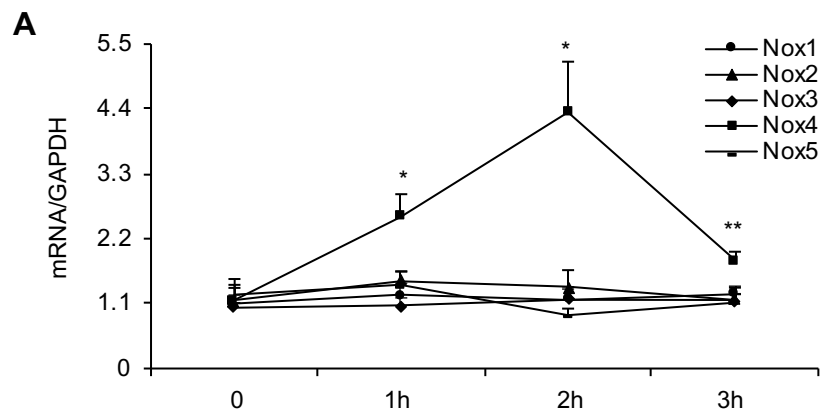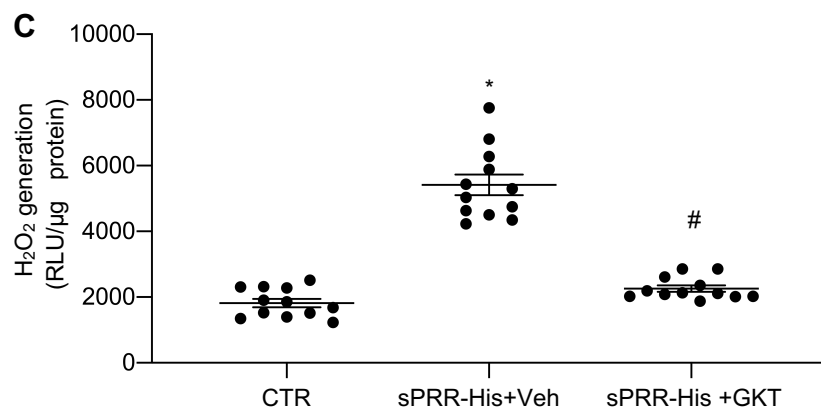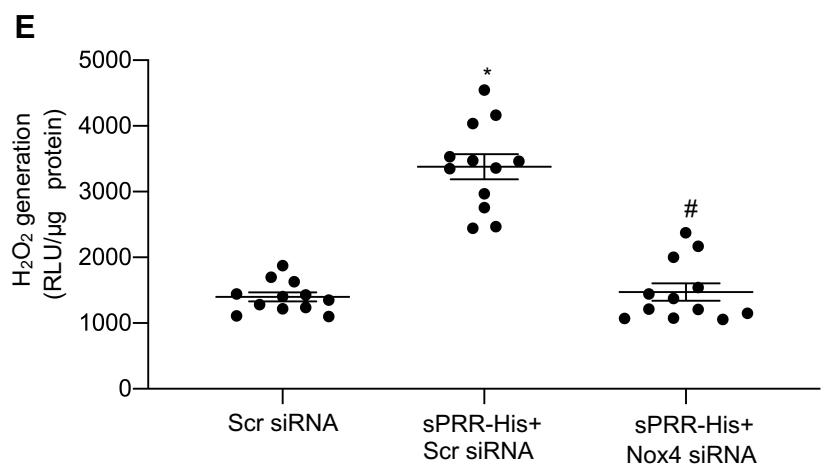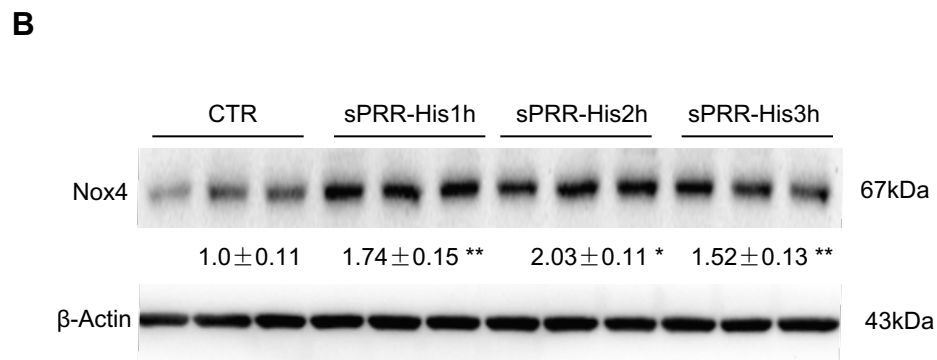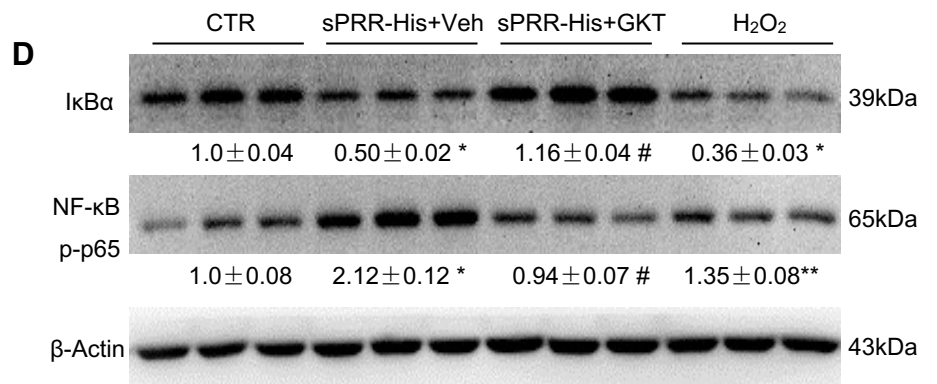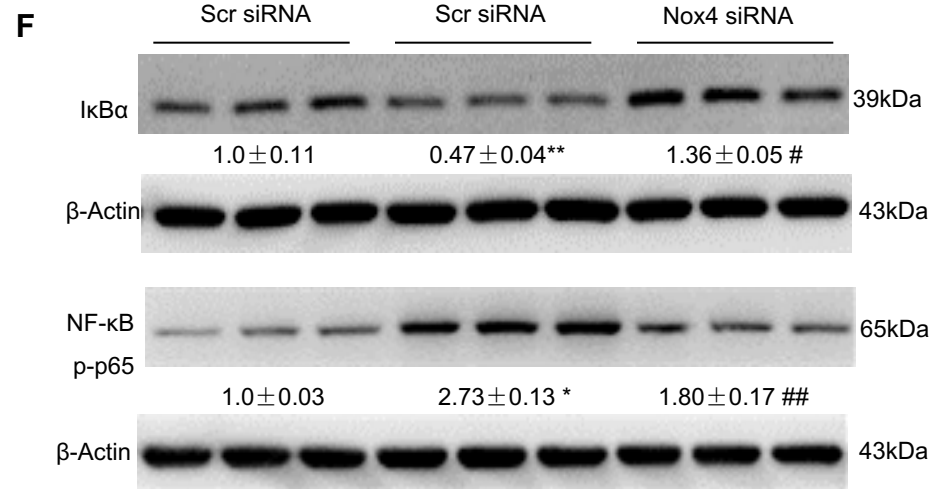

**Fig. S3. sPRR-His activates NF- $\kappa$ B secondary to increasing intracellular Nox4-derived H<sub>2</sub>O<sub>2</sub>.** (A) Relative mRNA expression of Nox1, Nox2, Nox3, Nox4 and Nox5 in response to 50nM sPRR-His for different time. (B) Relative protein expression of Nox4 in response to 50nM sPRR-His. (C) HUVECs were pretreated with 10 $\mu$ M Nox1/4 inhibitor GKT137892 (GKT) or vehicle (Veh) for 1h followed by exposure to sPRR-His for 30min. Effect of GKT on sPRR-His-induced H<sub>2</sub>O<sub>2</sub> generation. (D) HUVECs were pretreated with the 10 $\mu$ M GKT or vehicle (Veh) for 1h then followed by exposure to sPRR-His for 2h. Effect of GKT on sPRR-His-induced NF- $\kappa$ B activation. Effect of the administration of 200 $\mu$ M exogenous H<sub>2</sub>O<sub>2</sub> on NF- $\kappa$ B activation. (E) HUVECs were transfected with scrambled small interfering RNA (Scr siRNA) or Nox4 siRNA, followed by exposure to sPRR-His for 30min. Effect of Nox4 siRNA knockdown on sPRR-His-induced H<sub>2</sub>O<sub>2</sub> generation. (F) HUVECs were transfected with Scr siRNA or Nox4 siRNA, followed by exposure to sPRR-His for 2h. Effect of Nox4 siRNA knockdown on sPRR-His-induced NF- $\kappa$ B activation. The value beneath the image indicates the densitometry of the protein normalized to  $\beta$ -Actin for 3 separate experiments. N=9-12 (N represents the number of samples in each group, and the repetitions of separate experiments are 3-4). Statistical analysis was performed by using one-way ANOVA with the Bonferroni test for multiple comparisons or by using unpaired Student's t test for two comparisons. \*P<0.01, compared with the CTR or Scr siRNA; \*\*P<0.05, compared with the CTR or Scr siRNA; #P<0.01, compared with the sPRR-His or sPRR-His+Scr siRNA; ##P<0.05, compared with the sPRR-His or sPRR-His +Scr siRNA. Data are mean  $\pm$  SEM.

**Fig. S4**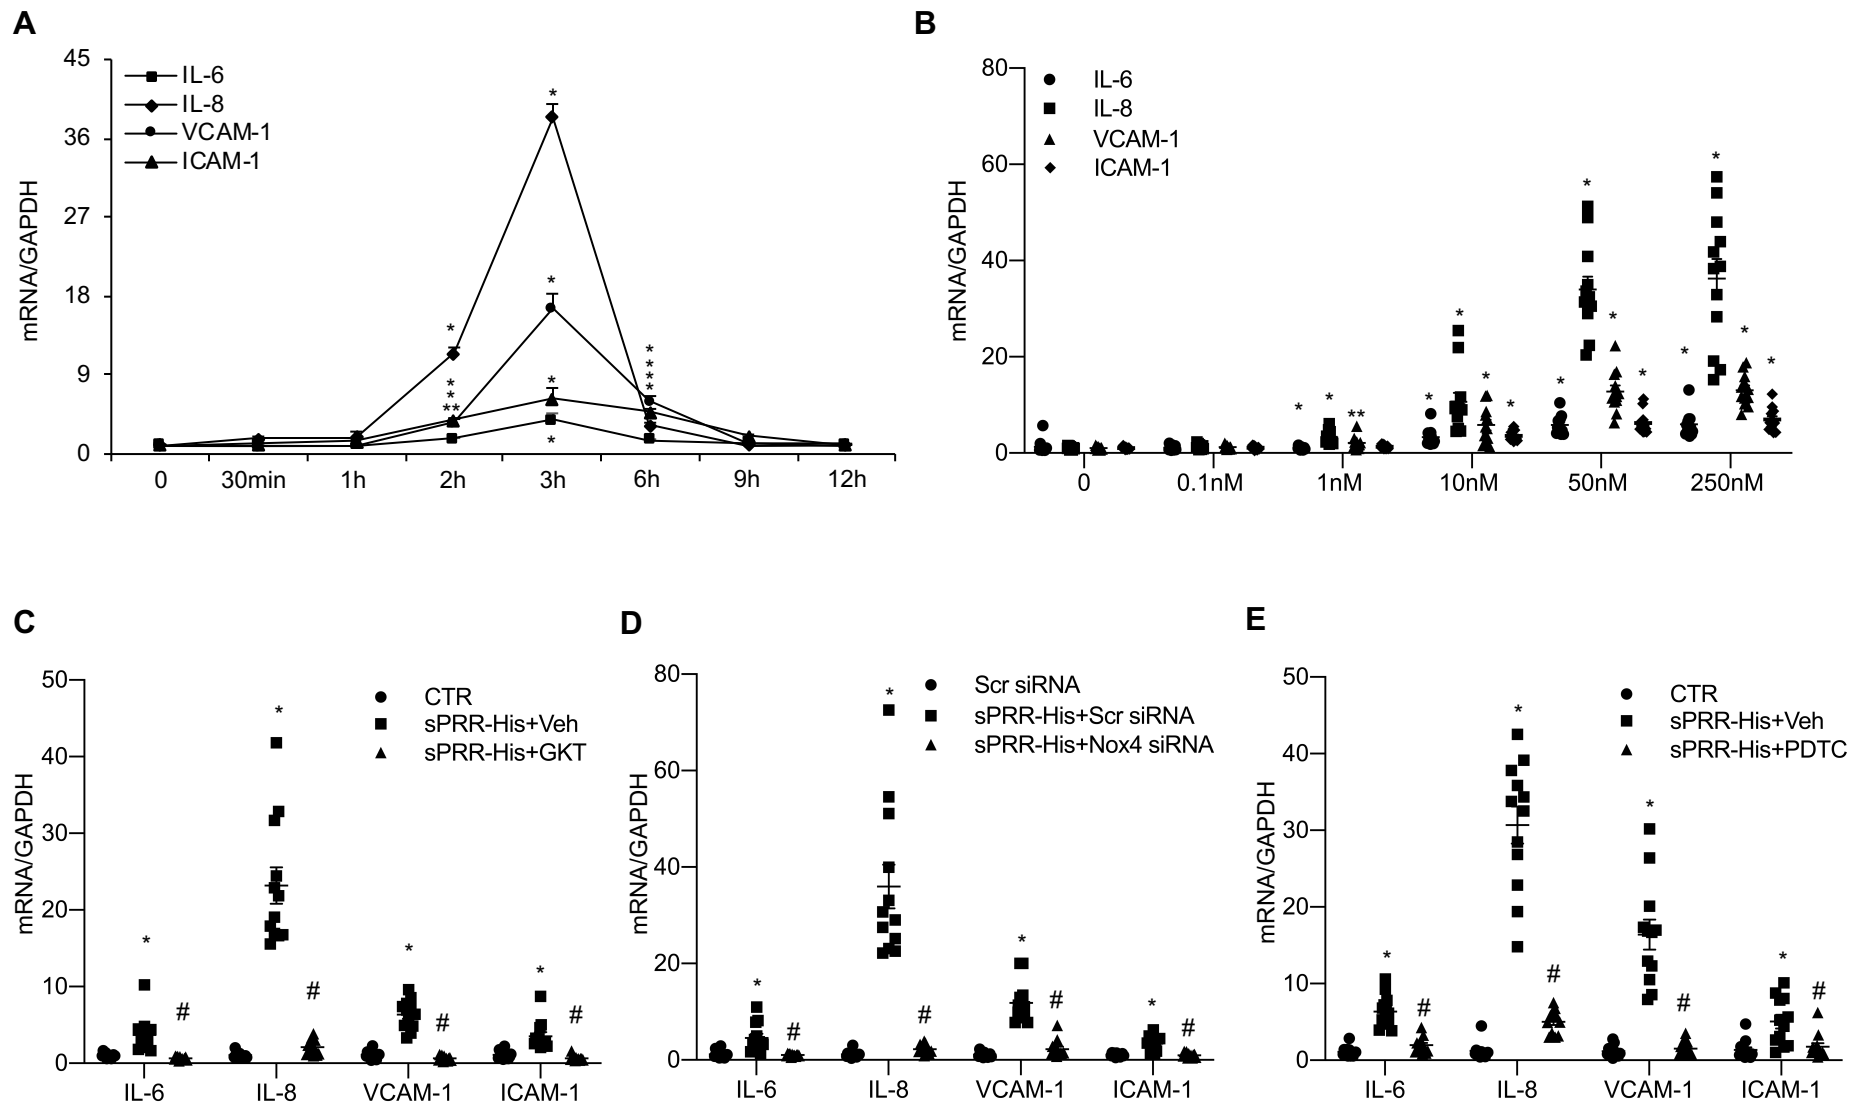

**Fig. S4. sPRR-His evokes inflammation.** Relative mRNA expression levels of IL-6, IL-8, VCAM-1 and ICAM-1 were measured by qRT-PCR. **(A)** HUVECs were treated with blank buffer or 50nM sPRR-His for 30min, 1h, 2h, 3h, 6h, 9h and 12h. **(B)** HUVECs were treated with blank buffer or 0.1nM, 1nM, 10nM, 50nM, 250nM sPRR-His for 3h. Effects of 10 $\mu$ M GKT **(C)**, Nox4 siRNA **(D)** or 50 $\mu$ M PDTC **(E)** on mRNA expression of IL-6, IL-8, VCAM-1 and ICAM-1 after sPRR-His 3-h treatment. N=12 (N represents the number of samples in each group, and the repetitions of separate experiments are 3). Statistical analysis was performed by using one-way ANOVA with the Bonferroni test for multiple comparisons or by using unpaired Student's t test for two comparisons. \*P<0.01, compared with the CTR or Scr siRNA; \*\*P<0.05, compared with the CTR or Scr siRNA; #P<0.01, compared with the sPRR-His or sPRR-His+Scr siRNA. Data are mean  $\pm$  SEM.



**Fig. S5**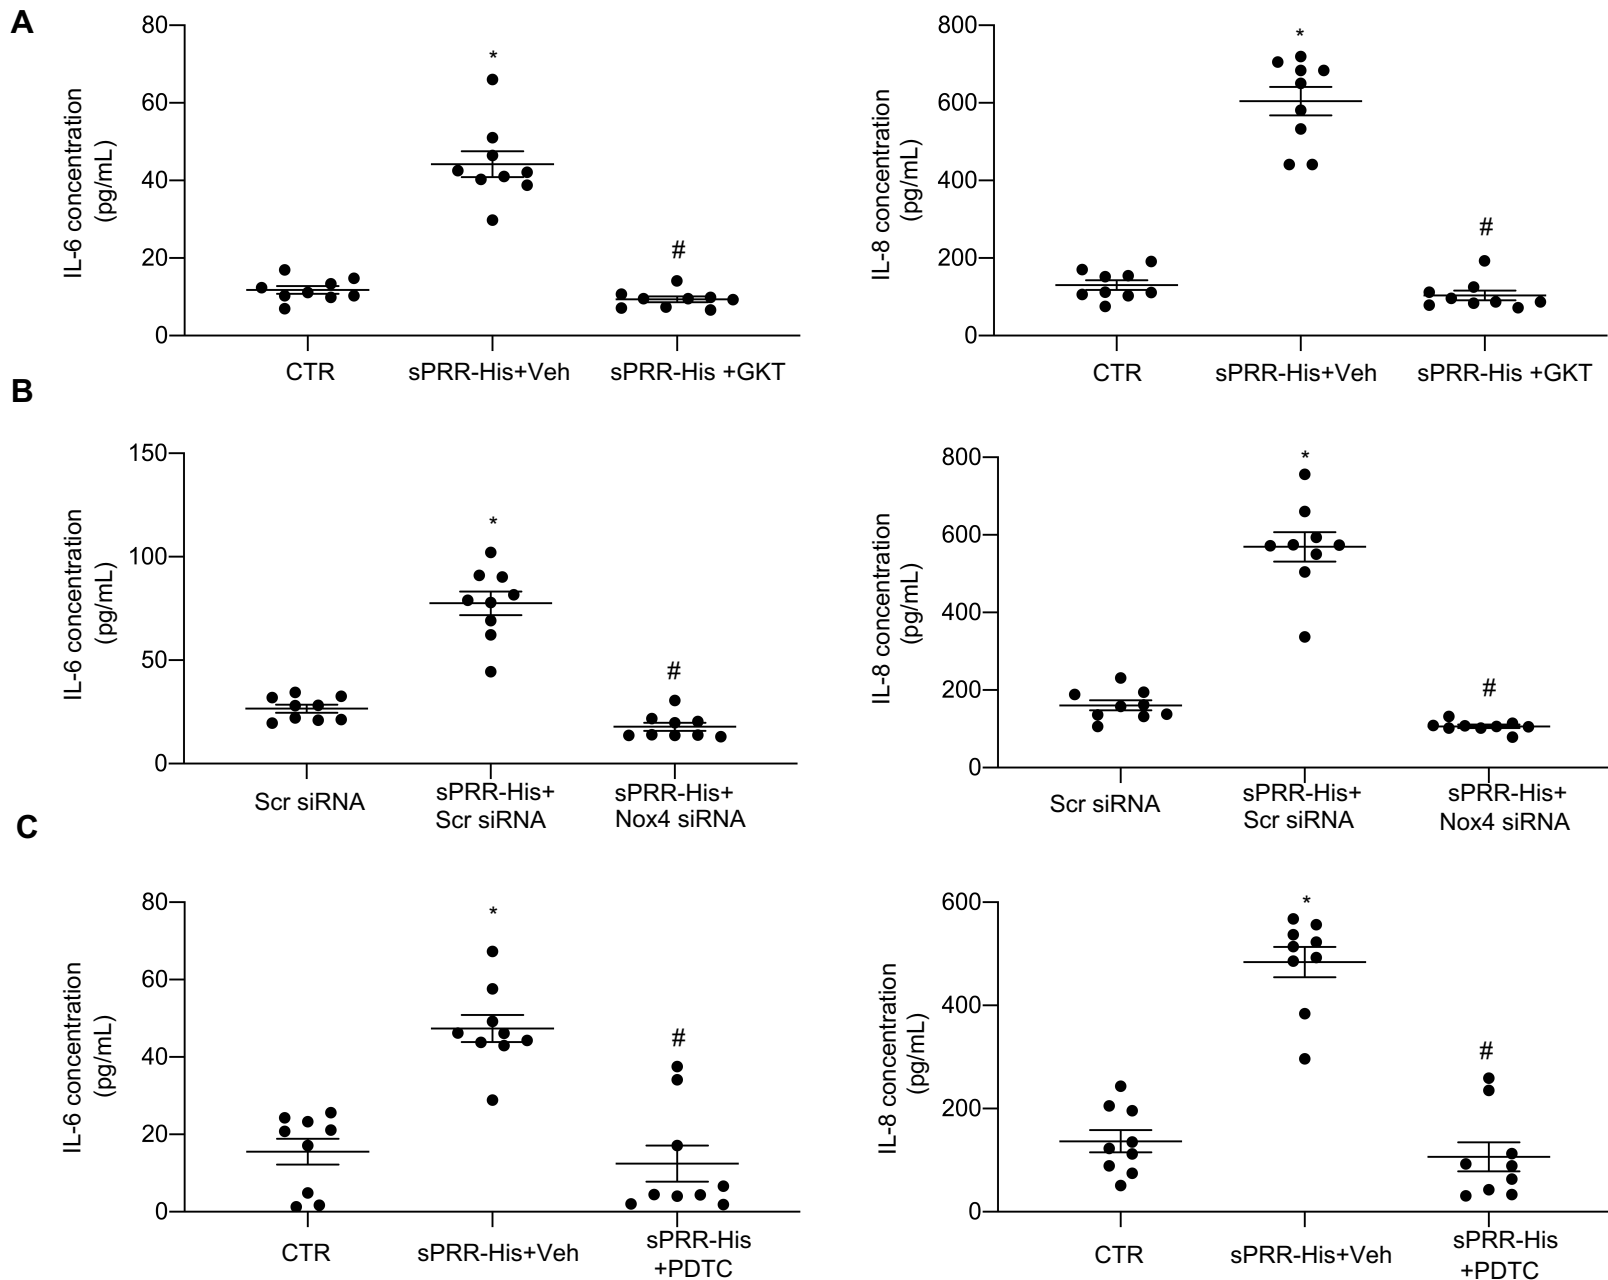

**Fig. S5. sPRR-His evokes inflammation.** The protein levels of the IL-6 and IL-8 in the cell medium supernatant were measured by ELISA. Effect of 10 $\mu$ M GKT (**A**), Nox4 siRNA (**B**) or 50 $\mu$ M PDTIC (**C**) on protein levels of IL-6 and IL-8 in the medium of HUVECs after 50nM sPRR-His treatment. N=9 (N represents the number of samples in each group, and the repetitions of separate experiments are 3). Statistical significance was determined by using one-way ANOVA with the Bonferroni test for multiple comparisons. \*P<0.01, compared with the CTR or Scr siRNA; #P<0.01, compared with the sPRR-His or sPRR-His+Scr siRNA. Data are mean  $\pm$  SEM.

**Fig. S6**

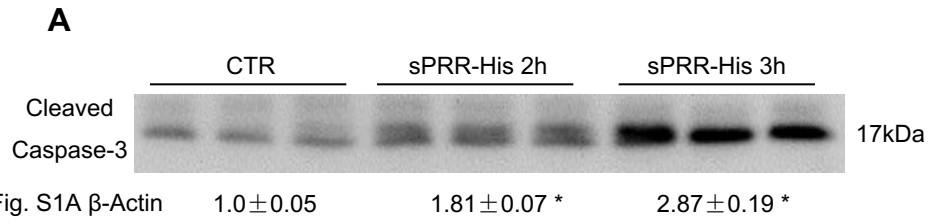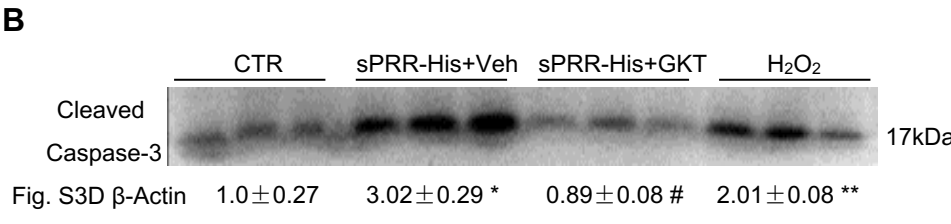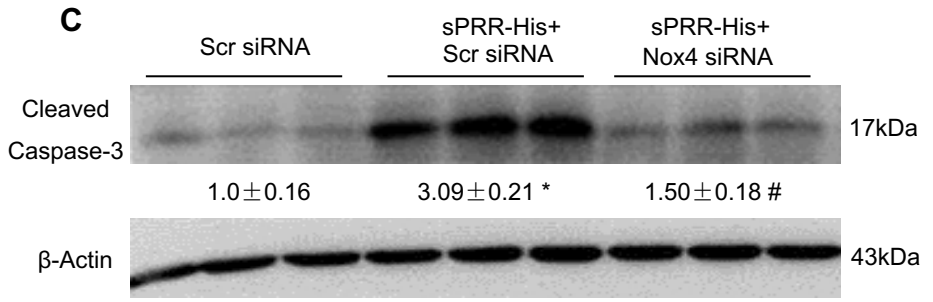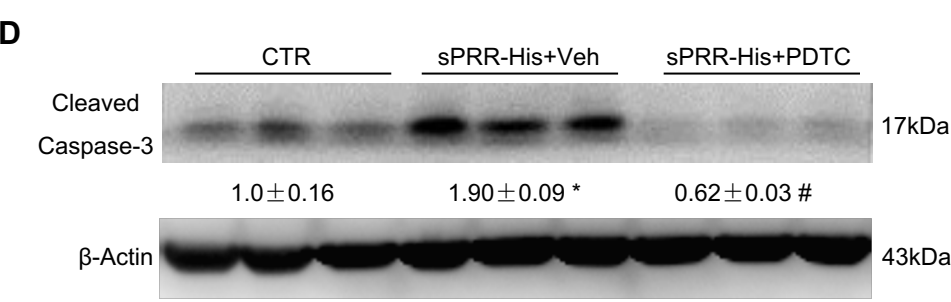

**Fig. S6. sPRR-His increases apoptosis.** Relative protein expression levels of cleaved caspase-3 were measured by Western blotting. (A) Relative protein expression levels of cleaved caspase-3 after 50nM sPRR-His 2-h and 3-h treatment. Effects of 10 $\mu$ M GKT (B), Nox4 siRNA (C) or 50 $\mu$ M PDTTC (D) on relative protein expression levels of cleaved caspase-3 after sPRR-His 3-h treatment. Effect of the administration of 200 $\mu$ M exogenous H<sub>2</sub>O<sub>2</sub> (B) on relative protein expression levels of cleaved caspase-3. Fig. S6A and Fig. S1A are from the same western blotting membrane, the  $\beta$ -Actin between them are same. Fig. S6B and Fig. S3D are from the same western blotting membrane, the  $\beta$ -Actin between them are same. The value beneath the image indicates the densitometry of the protein normalized to  $\beta$ -Actin for 3 separate experiments. N=9. Statistical analysis was performed by using one-way ANOVA with the Bonferroni test for multiple comparisons or by using unpaired Student's t test for two comparisons. \*P<0.01, compared with the CTR or Scr siRNA; \*\*P<0.05, compared with the CTR or Scr siRNA; #P<0.01, compared with the sPRR-His or sPRR-His+Scr siRNA. Data are mean  $\pm$  SEM.

Fig. S7

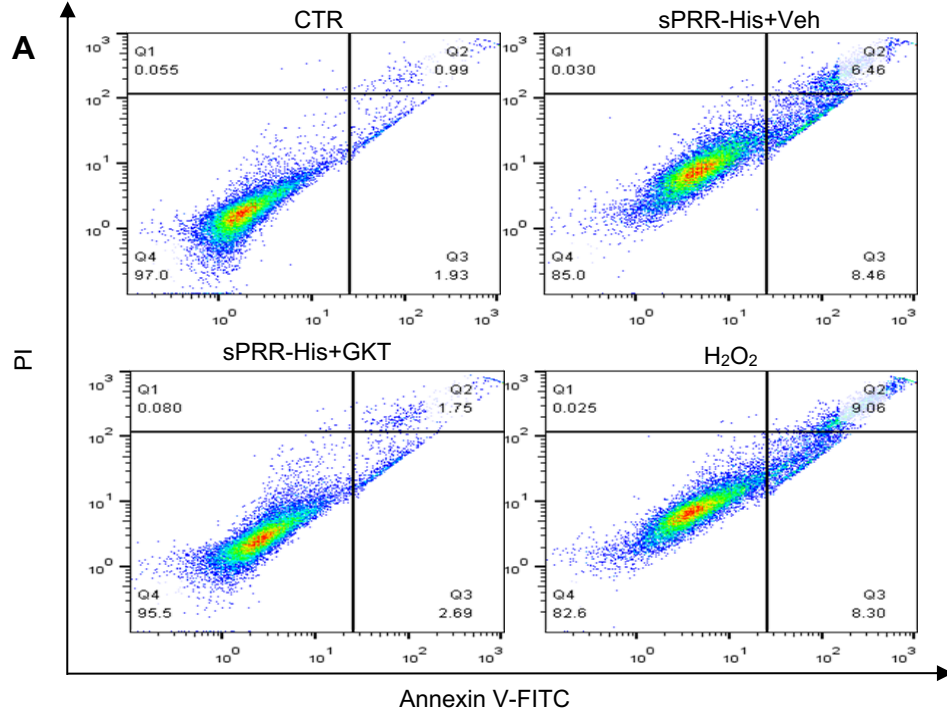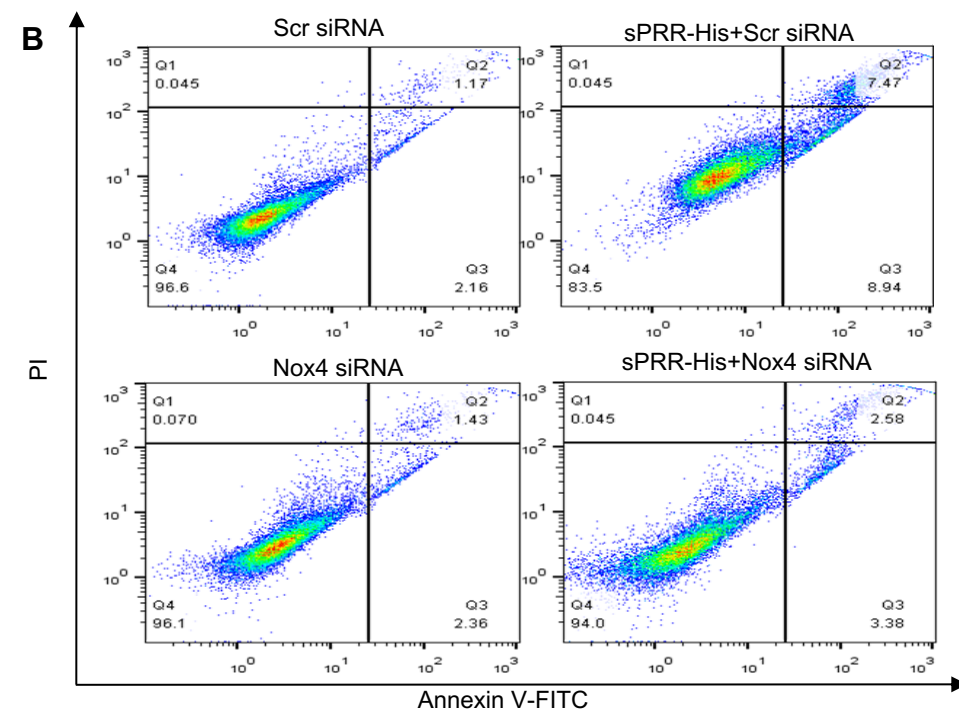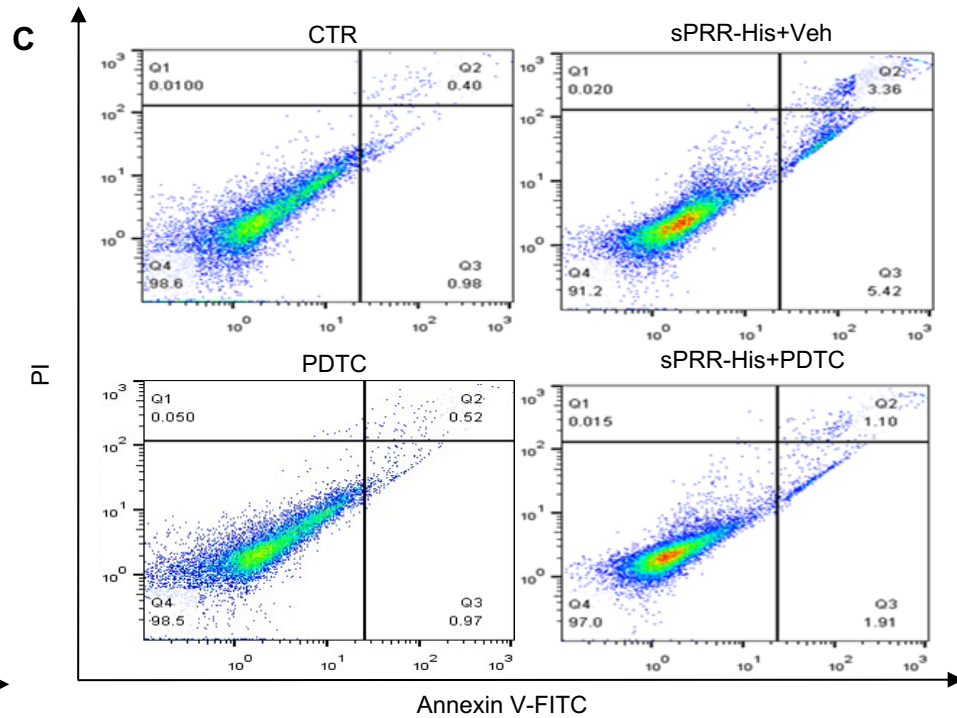

**Fig. S7. sPRR-His increases apoptosis.** The apoptotic populations were determined by Annexin V-FITC/PI flow cytometry analysis. The right lower quadrant (Q3) represents the early apoptotic cells and the right upper quadrant (Q2) represents the late apoptotic cells. The left lower quadrant (Q4) represents the viable cells and the left upper quadrant (Q1) represents the necrotic cells. Effects of 10 $\mu$ M GKT (**A**), Nox4 siRNA (**B**) or 50 $\mu$ M PDTC (**C**) on sPRR-His-induced apoptosis. Effect of the administration of 200 $\mu$ M exogenous H<sub>2</sub>O<sub>2</sub> (**A**) on apoptosis.

**Fig. S8**

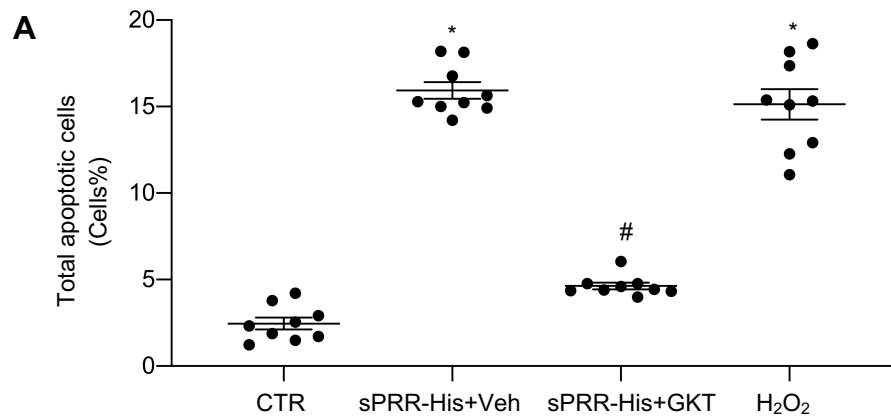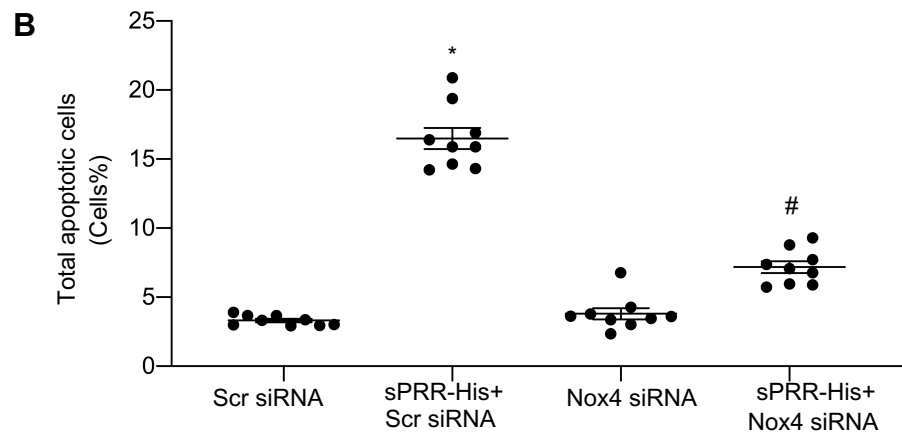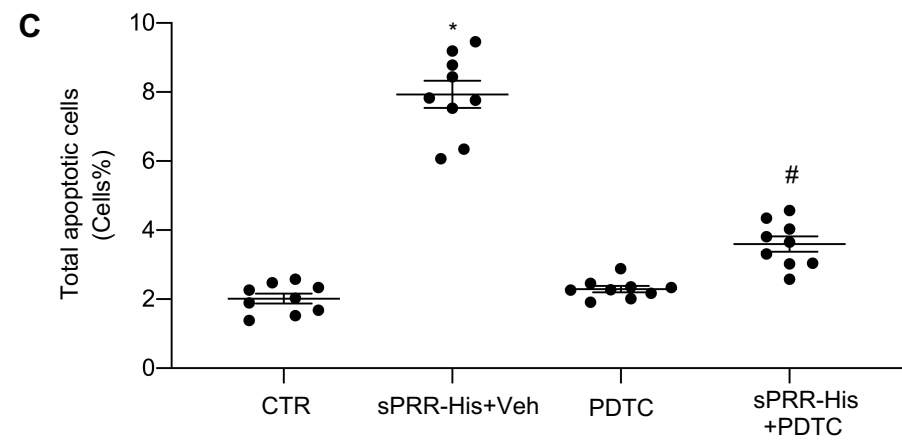

**Fig. S8. Quantitative analysis of the percentage of total apoptotic cells.** The early apoptotic cells percentage added to the late apoptotic cells percentage equals the total apoptotic cells percentage. Effects of 10 $\mu$ M GKT (**A**), Nox4 siRNA (**B**) or 50 $\mu$ M PDTC (**C**) on sPRR-His-induced apoptosis. Effect of the administration of 200 $\mu$ M exogenous H<sub>2</sub>O<sub>2</sub> (**A**) on apoptosis. N=9 (N represents the number of samples in each group, and the repetitions of separate experiments are 3). Statistical significance was determined by using one-way ANOVA with the Bonferroni test for multiple comparisons. \*P<0.01, compared with the CTR or Scr siRNA; #P<0.01, compared with the sPRR-His or sPRR-His+Scr siRNA. Data are mean  $\pm$  SEM.



**Fig. S9**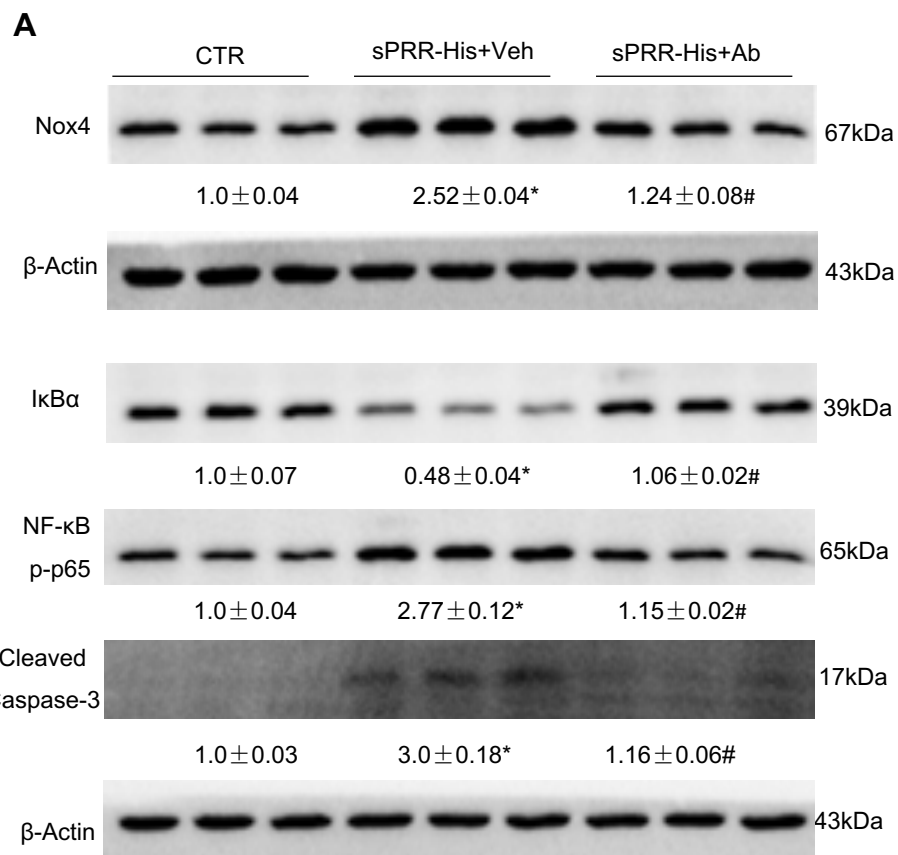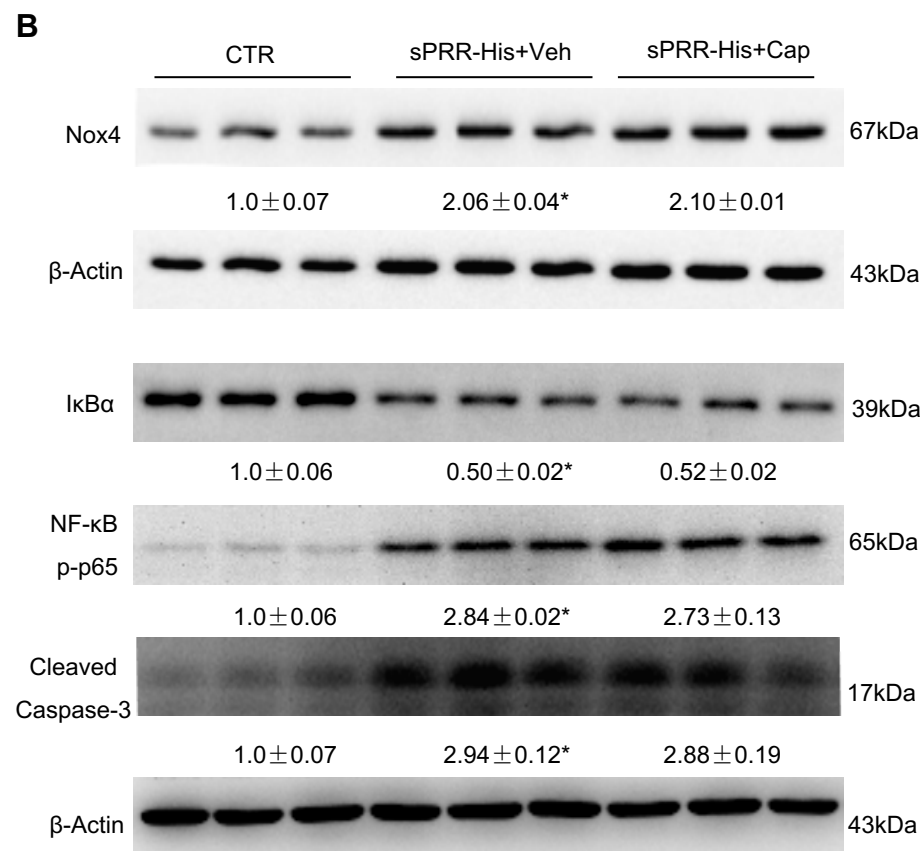

**Fig. S9. The effect of sPRR neutralizing antibody or ACEi on the functions of sPRR-His in HUVECs.** (A) HUVECs were pretreated with 1.5 µg/ml sPRR neutralizing antibody (Ab) or vehicle (Veh) for 1h followed by exposure to 50nM sPRR-His. Effect of sPRR-His on relative protein expression levels of Nox4, IκBα, NF-κB p-p65 and cleaved caspase-3 in the presence or absence of Ab. (B) HUVECs were pretreated with 10µM ACEi Captopril (Cap) or vehicle (Veh) for 1h followed by exposure to 50nM sPRR-His. Effect of sPRR-His on protein expression of Nox4, IκBα, NF-κB p-p65 and cleaved caspase-3 in the presence or absence of 10µM Cap. The value beneath the image indicates the densitometry of the protein normalized to β-actin for 3 separate experiments, N=9. Statistical significance was determined by using one-way ANOVA with the Bonferroni test for multiple comparisons. \*P<0.01, compared with the CTR; #P<0.01, compared with the sPRR-His. Data are mean ± SEM.

**Fig. S10****A**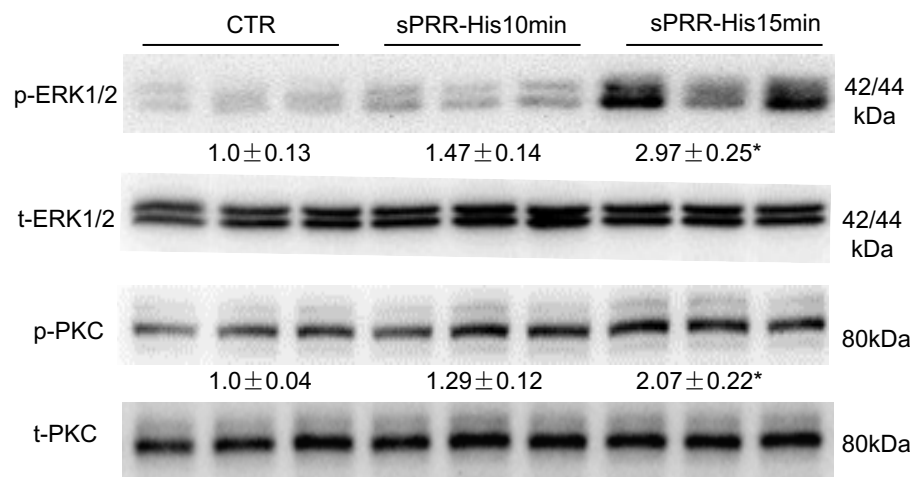**B**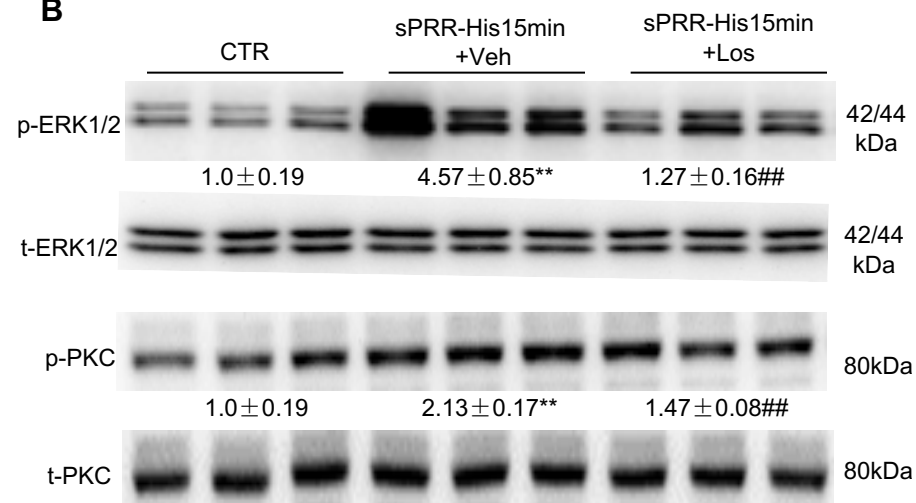**C**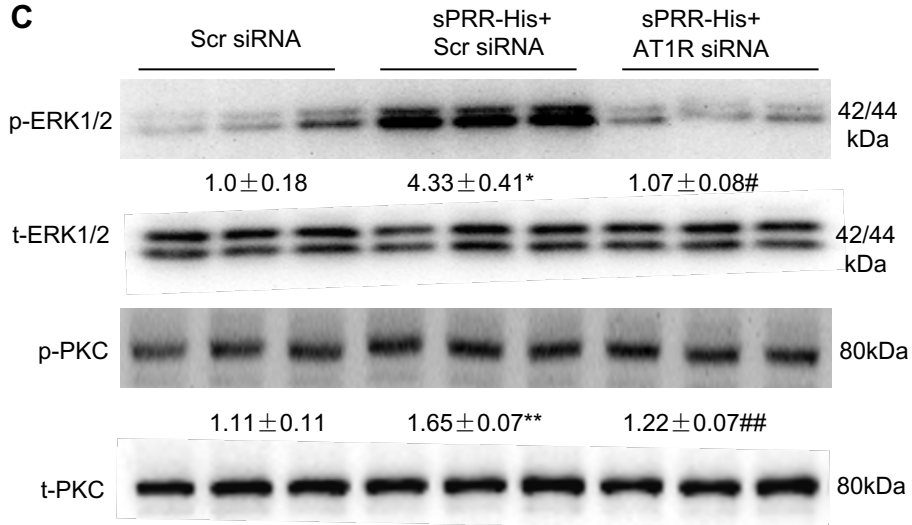**D**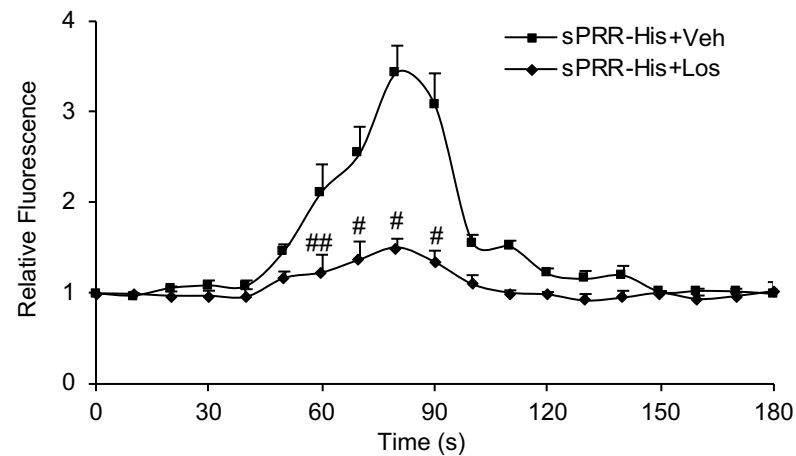

**Fig. S10. sPRR-His directly activates AT1R-Gq signaling.** (A-B) Representative western blots and quantification of phosphorylated and total ERK1/2 and PKC in 50nM sPRR-His treated HUVECs with or without 10 $\mu$ M Losartan (Los) pretreatment. (C) Effect of 50nM sPRR-His on the phosphorylation of ERK1/2 and PKC in the presence or absence of AT1R siRNA knockdown. The value beneath the image indicates the densitometry of the protein normalized to total ERK1/2 or total PKC for 3 separate experiments. (D) Ca<sup>2+</sup> signaling in HUVECs stimulated by 50nM sPRR-His with or without 10 $\mu$ M Los pretreatment, detected using Fluo 3-AM. N=9 (N represents the number of samples in each group, and the repetitions of separate experiments are 3). Statistical analysis was performed by using one-way ANOVA with the Bonferroni test for multiple comparisons or by using unpaired Student's t test for two comparisons. \*P<0.01, compared with the CTR or Scr siRNA; \*\*P<0.05, compared with the CTR or Scr siRNA; #P<0.01, compared with the sPRR-His or sPRR-His+Scr siRNA; ##P<0.05, compared with the sPRR-His or sPRR-His +Scr siRNA. Data are mean  $\pm$  SEM.

**Fig. S11****A**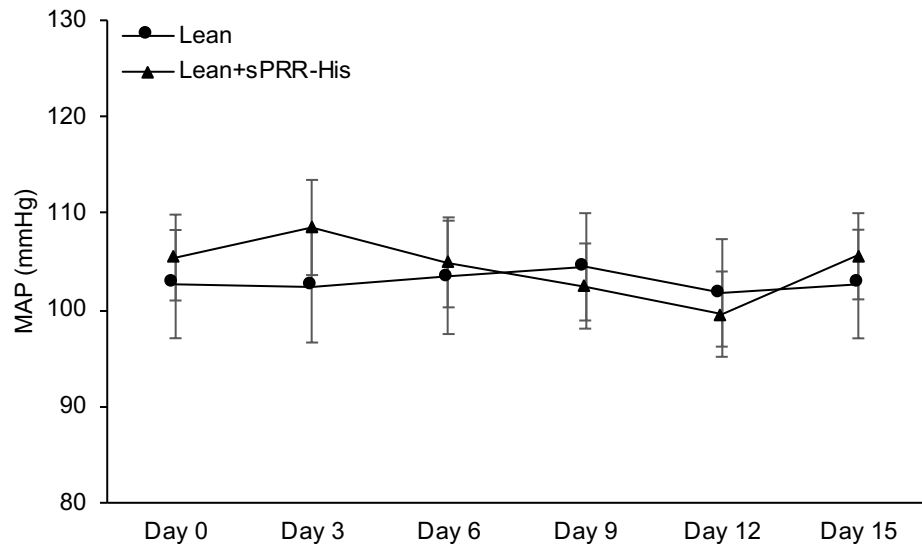**B**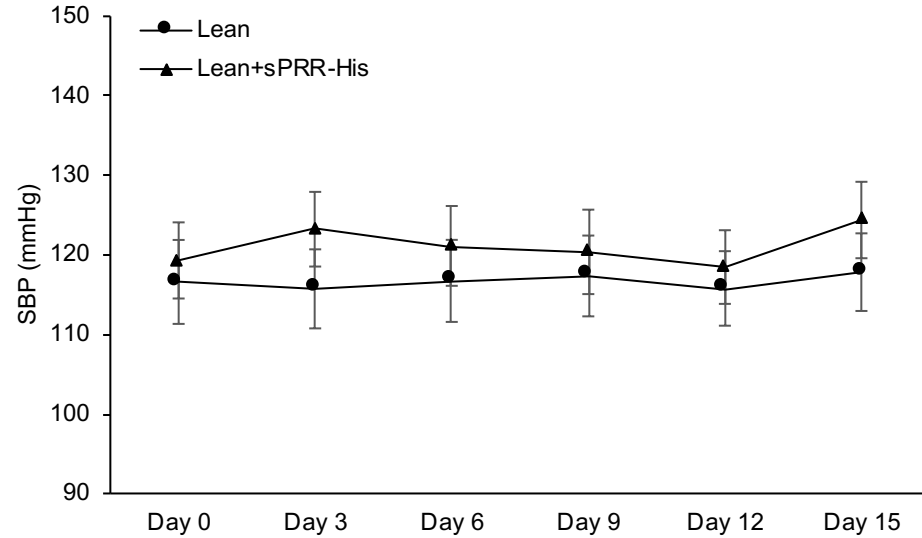**C**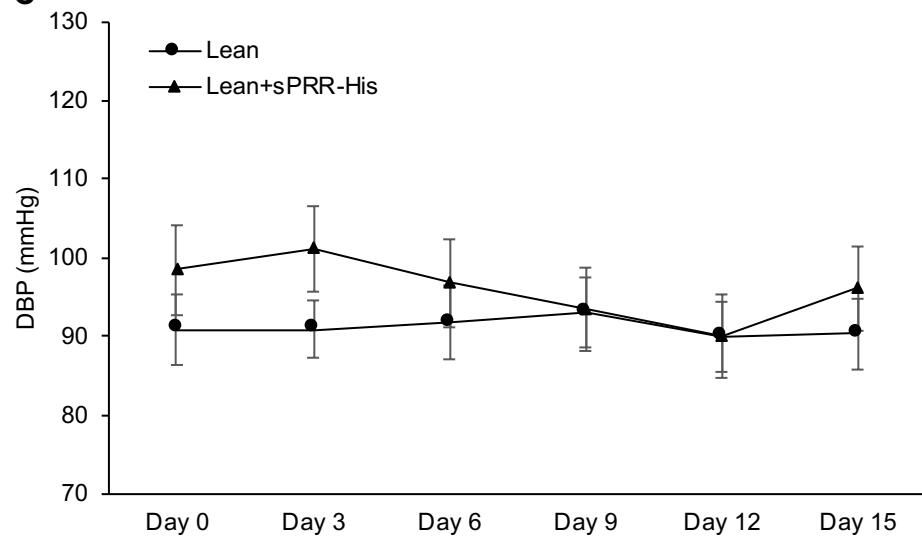**D**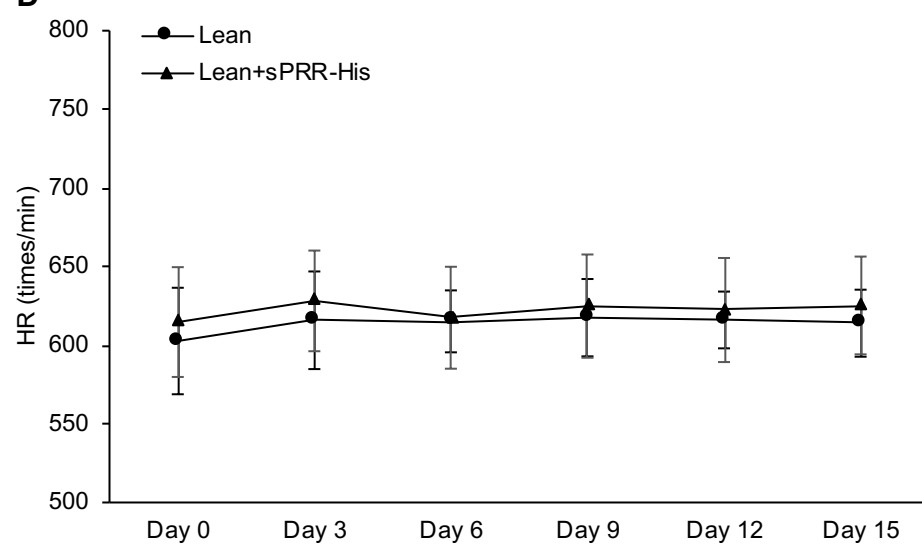

**Fig. S11. The effects of sPRR-His on blood pressure and heart rate in Lean mice.** Radiotelemetry was performed to record **(A)** mean arterial pressure (MAP), **(B)** systolic blood pressure (SBP), **(C)** diastolic blood pressure (DBP) and **(D)** heart rate (HR). N=4 per group. Statistical significance was determined by using unpaired Student's t test. Data are mean  $\pm$  SEM.

**Fig. S12****A**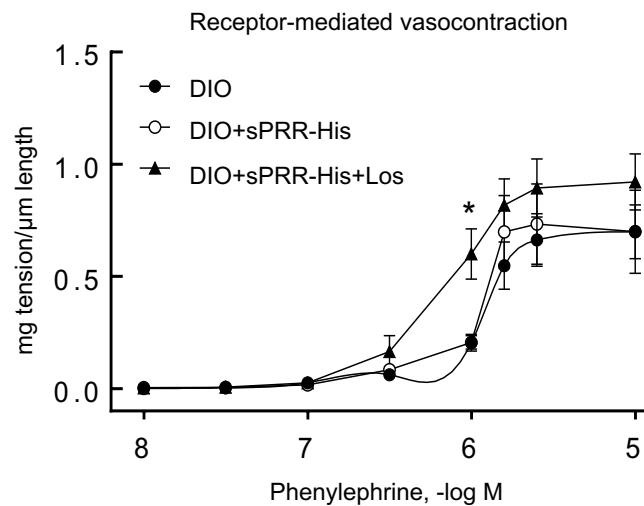**B**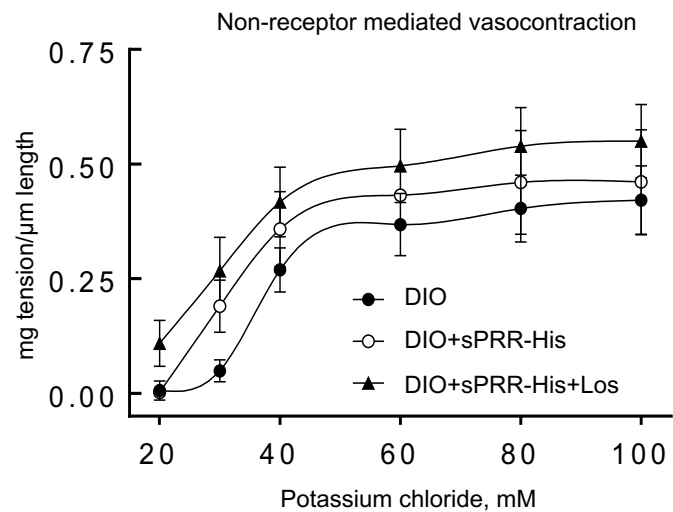**C**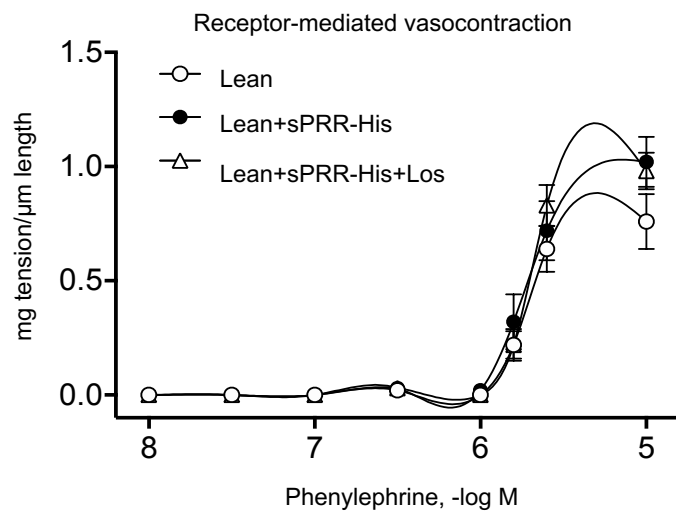**D**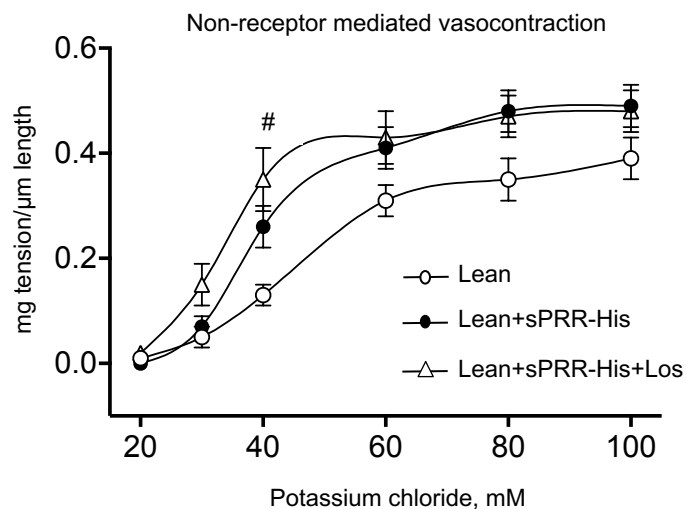

**Fig. S12. The effects of sPRR-His and Losartan on vasoconstriction function in DIO mice or lean mice.** Vasocontraction to (A&C) phenylephrine and (B&D) potassium chloride were measured by wire myograph. For **A** and **B**, N=6–8 per group. For **C** and **D**, N=7-8 per group. Comparison of one time point among groups was made using one-way ANOVA. Comparison of multiple time points among groups was made using one-way or two-way repeated-measures ANOVA. Tukey post hoc tests were performed when significant main effects were obtained. \*P<0.05, compared with DIO+ sPRR-His; #P < 0.05, compared with the Lean. Data are mean  $\pm$  SEM.



## A. Femoral artery vasoreactivity

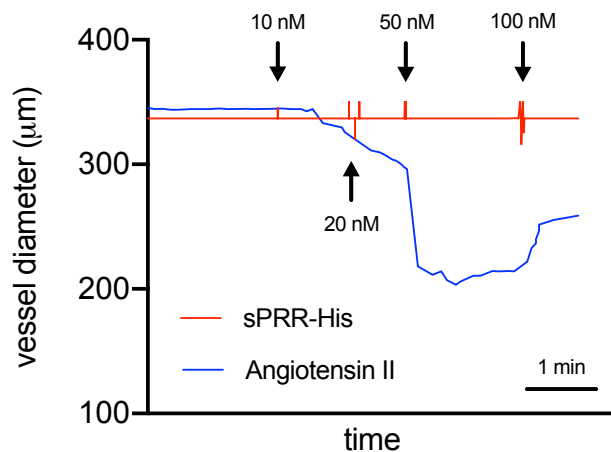

## B. Representative images

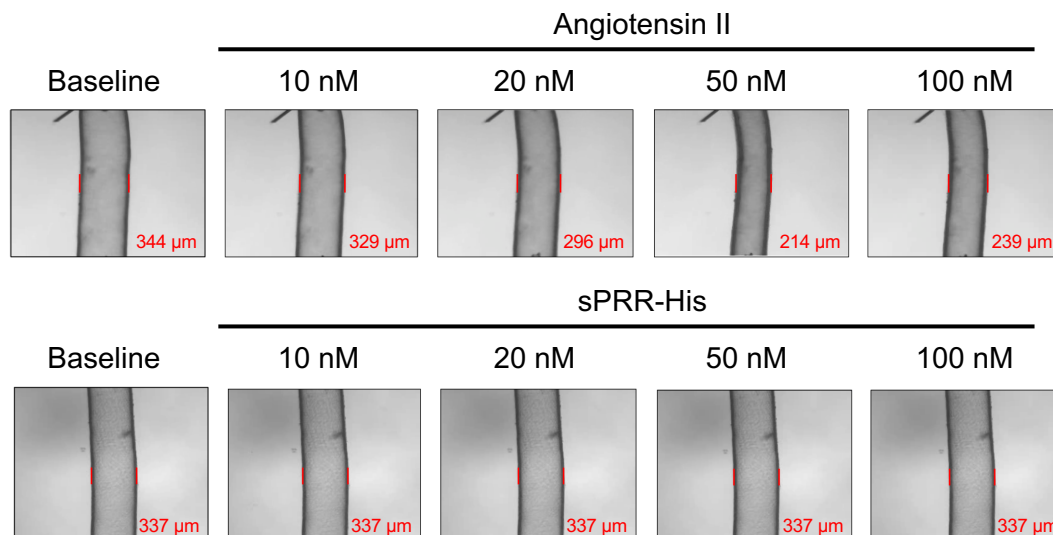

**Fig. S13. Mesenteric artery reactivity to angiotensin II (Ang II) and sPRR-His.** Ang II evokes vasoconstriction of murine mesenteric artery at 10, 20, and 50 nM, but relative vasodilation at 100 nM. sPRR-His (10-100 nM) does not influence vasoreactivity of mesenteric arteries. Vessels were mounted on glass micropipettes and placed in a myograph chamber. The chamber was warmed from room temperature to 36.5°C as vessels pressurized from 0 mmHg to 60 mmHg over 60-min. After noting that responses to 100 mM KCl were similar in both arteries (~ 60% vasoconstriction from baseline), the chambers were rinsed twice over a 30-min period. Next, one artery was treated with 10, 20, 50, and 100 nM of Ang II, while another artery was treated with equivalent doses of sPRR-His (1 min per dose). **A.** Using edge-detection tracker software (Myoview; DMT, Aarhus, Denmark), the outer diameter of each artery was recorded. Ang II constricted the mesenteric artery at 10, 20, and 50 nM (blue line indicates vessel diameter in A). The maximal response was 37% vasoconstriction from baseline. However, 100 nM caused relative vasodilation from maximal constriction. On the other hand, 10-100 nM sPRR-His did not influence mesenteric artery vasoreactivity (red line indicates vessel diameter in A). **B.** Representative images of mesenteric arteries in response to 10-100 nM Ang II or sPRR-His. The values in red text in each image indicate the outer diameter of the artery.
